# Supplementary material
Source: PubMed Central journal article supplement (PMC2443837)
Supplement: mmc1.pdf [file mmc1.pdf]

## Supplemental Data

### ***FOXG1* Is Responsible**

### **for the Congenital Variant**

### **of Rett Syndrome**

Francesca Ariani, Giuseppe Hayek, Dalila Rondinella, Rosangela Artuso, Maria Antonietta Mencarelli, Ariele Spanhol-Rosseto, Marzia Pollazon, Sabrina Buoni, Ottavia Spiga, Sara Ricciardi, Ilaria Meloni, Ilaria Longo, Francesca Mari, Vania Broccoli, Michele Zappella, and Alessandra Renieri

Table S1. Primers and Probe Sequences for Real-Time qPCR

| <b>Primers (5'–3')</b>                        | <b>TaqMan Probe (5'–3')</b> |
|-----------------------------------------------|-----------------------------|
| GCCACAATCTGTCCCTCAACA<br>GACGGGTCCAGCATCCAGTA | TGAAGGTGCCGCG CCACTACG      |
